# Supplementary material for: MiR-34a promotes fibrosis of hepatic stellate cells via the TGF-β pathway
Source: PubMed Central journal article supplement — Ann Transl Med. 2021 Oct;9(20):1520. doi: 10.21037/atm-21-5005 (PMC8576652; doi:10.21037/atm-21-5005), 2021-10
Supplement: atm-09-20-1520-dss.pdf [file atm-09-20-1520-dss.pdf]

| <b>Data Sharing Statement</b> |                                                                                                                                                     |                                                            |
|-------------------------------|-----------------------------------------------------------------------------------------------------------------------------------------------------|------------------------------------------------------------|
| <b>Article Info</b>           | <a href="https://dx.doi.org/10.21037/atm-21-5005">https://dx.doi.org/10.21037/atm-21-5005</a>                                                       |                                                            |
| <b>Item</b>                   | <b>Question</b>                                                                                                                                     | <b>Authors' Response<br/>(place "-" if not applicable)</b> |
| 1                             | Would you like to share data collected for your study to others?                                                                                    | No                                                         |
| 2                             | If not, would you like to share the reason for your decision?                                                                                       | Further research is needed based on current results.       |
| 3                             | What data in particular will be shared?                                                                                                             | -                                                          |
| 4                             | Any other documents will be shared? Such as study protocol, statistical analysis plan, informed consent form, clinical study report, analytic code. | -                                                          |
| 5                             | When will data availability begin?                                                                                                                  | -                                                          |
| 6                             | When will data availability end?                                                                                                                    | -                                                          |
| 7                             | To whom will you share the data?                                                                                                                    | -                                                          |
| 8                             | For what type of analysis or purpose?                                                                                                               | -                                                          |
| 9                             | How or where can the data/documents be obtained?                                                                                                    | -                                                          |
| 10                            | Any other restrictions?                                                                                                                             | -                                                          |
